# Supplementary material for: Potential for Prebiotic Stabilized Cornus mas L. Lyophilized Extract in the Prophylaxis of Diabetes Mellitus in Streptozotocin Diabetic Rats
Source: MDPI journal article supplement (doi:10.3390/antiox11020380), 2022-02-14
Supplement: s1 [file s1]

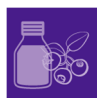

Supplementary materials

# Potential for the Prebiotic Stabilized *Cornus mas* L. Lyophilized Extract in the Prophylaxis of Type II Diabetes

Szymon Sip <sup>1</sup>, Justyna Chanaj-Kaczmarek <sup>1</sup>, Daria Szymanowska <sup>2</sup>, Krystyna Skalicka-Woźniak <sup>3</sup>, Barbara Budzyńska <sup>4</sup>, Olga Wronikowska-Denysiuk <sup>4</sup>, Tymoteusz Słowik <sup>5</sup>, Piotr Szulc <sup>6</sup>, Judyta Cielecka-Piontek <sup>1\*</sup>

<sup>1</sup> Department of Pharmacognosy, Poznan University of Medical Sciences, 4 Swieczkiego Street, 60-781 Poznan, Poland; szymonsip@ump.edu.pl (S.S.), justyna.chanaj-kaczmarek@ump.edu.pl (J.C.-K.), jpiontek@ump.edu.pl (J.C.-P.)

<sup>2</sup> Poznan University of Life Sciences, 31 Wojska Polskiego Street, 60-634 Poznan, Poland; darszy@up.poznan.pl (D.S.)

<sup>3</sup> Department of Natural Products Chemistry, Medical University of Lublin, 1 Chodźki Street, 20-093 Lublin, Poland; kskalicka@pharmacognosy.org (K.S.-W.)

<sup>4</sup> Independent Laboratory of Behavioral Studies, Medical University of Lublin, Lublin, Poland; barbara.budzynska@umlub.pl (B.B.), olga.wronikowska@gmail.com (O.W.-D.)

<sup>5</sup> Experimental Medicine Center, Medical University of Lublin, Jaczewskiego 8D, 20-090 Lublin, Poland; Tymoteusz.slowik@o2.pl (T.S.)

<sup>6</sup> Department of Agronomy, Poznań University of Life Sciences, Dojazd 11, 60-632 Poznań, Poland; piotr.szulc@up.poznan.pl (P.S.)

\* Corresponding author: jpiontek@ump.edu.pl

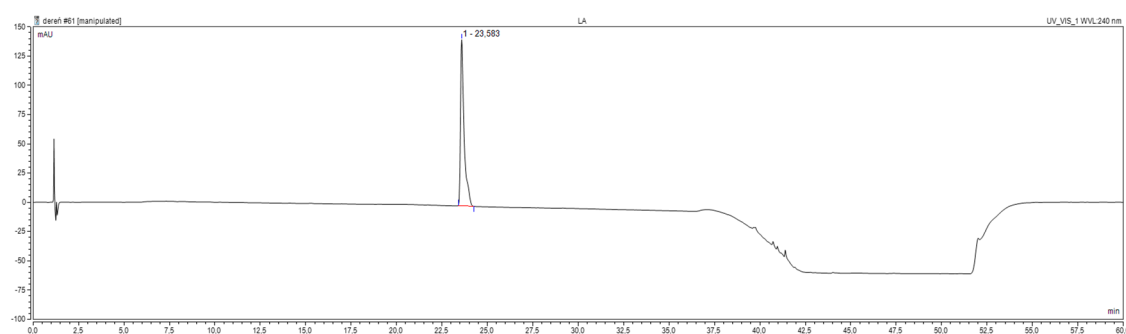

**Figure S1.** Chromatogram showing the loganic acid pattern in the developed method.

**Table S1.** Statistical assay of linear plots of the anthocyanin determined by the UHPLC-DAD method

| Parameter                                                                      | Delphinidin 3-O-glucoside | Cyanidin 3-O-glucoside               | Pelargonidin 3-O-glucoside           |
|--------------------------------------------------------------------------------|---------------------------|--------------------------------------|--------------------------------------|
| Linearity: $y = ax + b$                                                        |                           |                                      |                                      |
| $a \pm S_a$                                                                    | $0.2712 \pm 0.0140$       | $0.3384 \pm 0.0082$                  | $0.2460 \pm 0.0040$                  |
| $b \pm S_b$                                                                    | $7.2327 \pm 0.9850$       | $8.8446 \pm 0.2884$                  | $14.7807 \pm 0.2817$                 |
| correlation coefficient (r)                                                    | 0.9973                    | 0.9994                               | 0.9997                               |
| Limit of detection (LOD):<br>LOD = $3 SD/a$ ( $\mu\text{g mL}^{-1}$ )          | 9.17                      | 2.15                                 | 2.89                                 |
| Limit of quantification<br>(LOQ): LOQ = $10 SD/a$<br>( $\mu\text{g mL}^{-1}$ ) | 27.80                     | 6.52                                 | 8.76                                 |
| Range of linearity ( $\mu\text{g mL}^{-1}$ )                                   | 30 - 80                   | 15 - 80                              | 30 - 100                             |
| Precision, RSD                                                                 |                           |                                      |                                      |
| 30 ( $\mu\text{g mL}^{-1}$ )                                                   | 1.34                      | 15 ( $\mu\text{g mL}^{-1}$ )<br>0.60 | 30 ( $\mu\text{g mL}^{-1}$ )<br>0.74 |
| 50 ( $\mu\text{g mL}^{-1}$ )                                                   | 2.31                      | 25 ( $\mu\text{g mL}^{-1}$ )<br>3.04 | 50 ( $\mu\text{g mL}^{-1}$ )<br>0.27 |
| 80 ( $\mu\text{g mL}^{-1}$ )                                                   | 2.43                      | 40 ( $\mu\text{g mL}^{-1}$ )<br>5.58 | 80 ( $\mu\text{g mL}^{-1}$ )<br>0.64 |
| Intra-day, RSD                                                                 |                           |                                      |                                      |
| 30 ( $\mu\text{g mL}^{-1}$ )                                                   | 1.72                      | 30 ( $\mu\text{g mL}^{-1}$ )<br>0.99 | 30 ( $\mu\text{g mL}^{-1}$ )<br>0.88 |
| 50 ( $\mu\text{g mL}^{-1}$ )                                                   | 1.98                      | 50 ( $\mu\text{g mL}^{-1}$ )<br>1.35 | 50 ( $\mu\text{g mL}^{-1}$ )<br>0.32 |
| 80 ( $\mu\text{g mL}^{-1}$ )                                                   | 2.25                      | 80 ( $\mu\text{g mL}^{-1}$ )<br>2.44 | 80 ( $\mu\text{g mL}^{-1}$ )<br>0.75 |
| Retention time (min)                                                           | 6.16                      | 8.93                                 | 12.15                                |

**Table S2.** Statistical assay of linear plots of the loganic acid determined by the UHPLC-DAD method

| Parameter                                                                 | Loganic acid                   |      |
|---------------------------------------------------------------------------|--------------------------------|------|
| Linearity: $y = ax + b$                                                   |                                |      |
| $a \pm S_a$                                                               | 183.063 $\pm$ 3.469            |      |
| $b \pm S_b$                                                               | -11.047 $\pm$ 1.226            |      |
| correlation coefficient (r)                                               | 0.9963                         |      |
| Limit of detection (LOD):<br>LOD = 3 SD/a (mg mL <sup>-1</sup> )          | 0,257                          |      |
| Limit of quantification<br>(LOQ): LOQ = 10 SD/a<br>(mg mL <sup>-1</sup> ) | 0,848                          |      |
| Range of linearity (mg<br>mL <sup>-1</sup> )                              | 0,96 – 5,76                    |      |
| Precision, RSD                                                            |                                |      |
|                                                                           | 0,96 (mg<br>mL <sup>-1</sup> ) | 0,07 |
|                                                                           | 3,84 (mg<br>mL <sup>-1</sup> ) | 0,12 |
|                                                                           | 5,76 (mg<br>mL <sup>-1</sup> ) | 0,17 |
| Intra-day, RSD                                                            |                                |      |
|                                                                           | 0,96 (mg<br>mL <sup>-1</sup> ) | 0,09 |
|                                                                           | 3,84 (mg<br>mL <sup>-1</sup> ) | 0,15 |
|                                                                           | 5,76 (mg<br>mL <sup>-1</sup> ) | 0,22 |
| Retention time (min)                                                      | 23.5                           |      |

**Table S3.** The content of active compounds in the lyophilized *Cornus mas* fruit in 70% EtOH extract.

| Cultivar       | Content      |              |                            |                        |
|----------------|--------------|--------------|----------------------------|------------------------|
|                | mg GAE/g     | mg/g         |                            |                        |
|                | TPC          | Loganic acid | Pelargonidin 3-O-glucoside | Cyanidin-3-O-glucoside |
| Bolestraszycki | 11.14 ± 0.77 | 7.08 ± 0.33  | 2.68 ± 0.09                | 1.30 ± 0.12            |
| Florianka      | 9.51 ± 0.54  | 6.08 ± 0.24  | 3.98 ± 0.11                | 0.06 ± 0.01            |
| Słowianin      | 10.65 ± 0.69 | 6.50 ± 0.39  | 2.84 ± 0.10                | 1.17 ± 0.07            |
| Wydubieckij    | 19.16 ± 1.10 | 3.76 ± 0.19  | 0.12 ± 0.02                | 0.13 ± 0.02            |

**Table S4.** Water content in freeze-dried fruit expressed as % of weight loss during drying in a moisture analyzer.

| Variety        | Water content in freeze-dried fruit [%] |
|----------------|-----------------------------------------|
| Bolestraszycki | 6,83%                                   |
| Florianka      | 9,60%                                   |
| Słowianin      | 5,94%                                   |
| Wydubiecki     | 6,63%                                   |

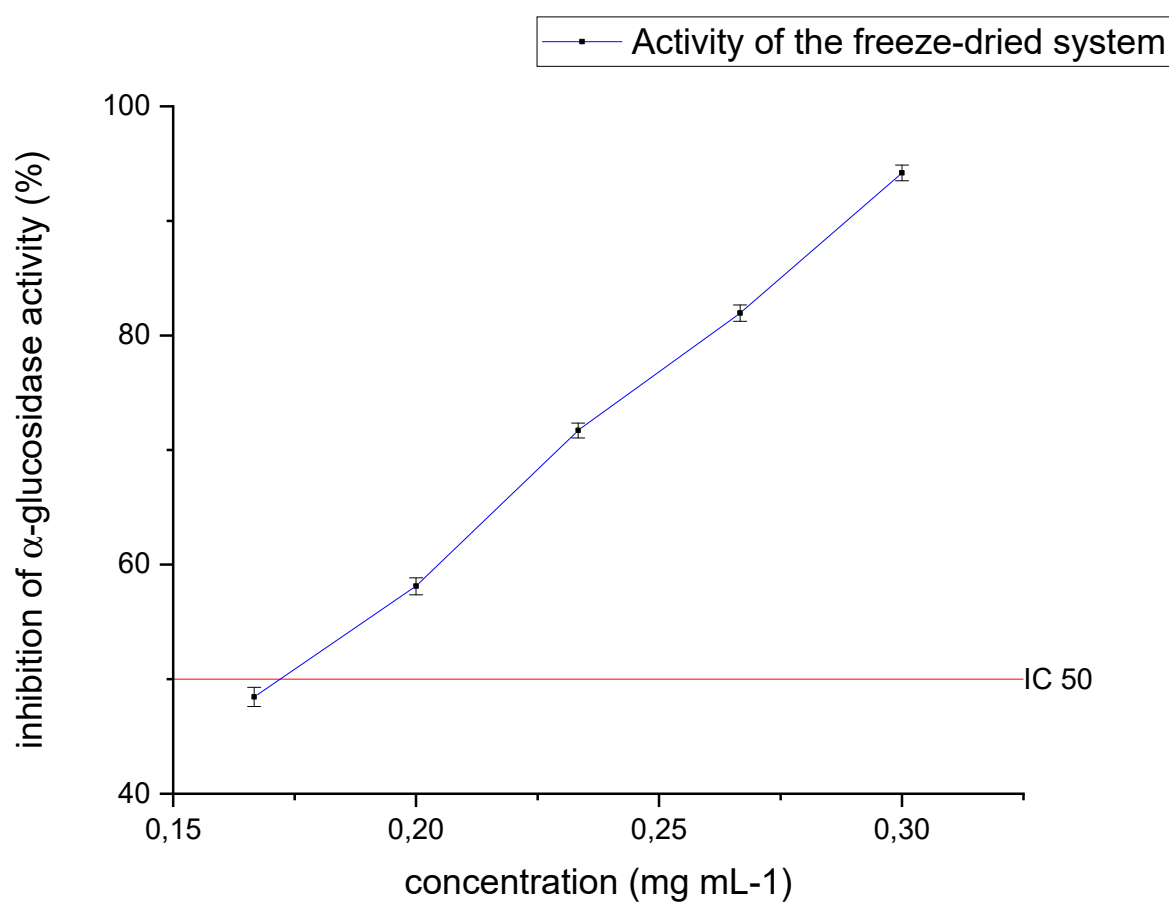**Figure S2.** The  $\alpha$ -glucosidase inhibitory activity of *Corni fructus* prebiotic system

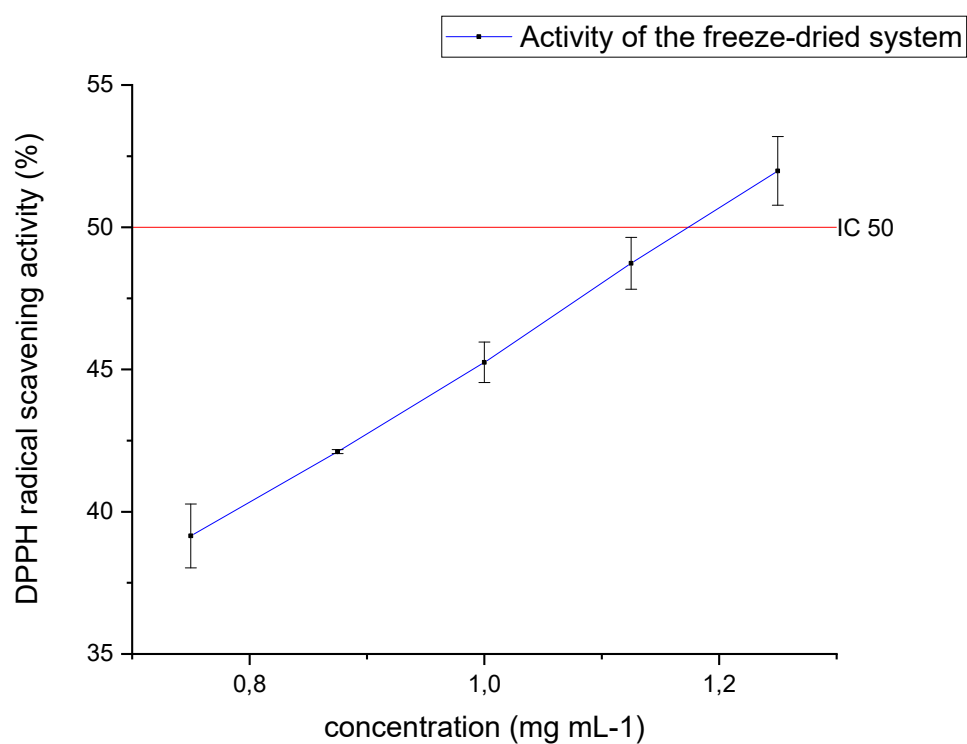

**Figure S3.** Antioxidant activity of Corni fructus system by DPPH assay

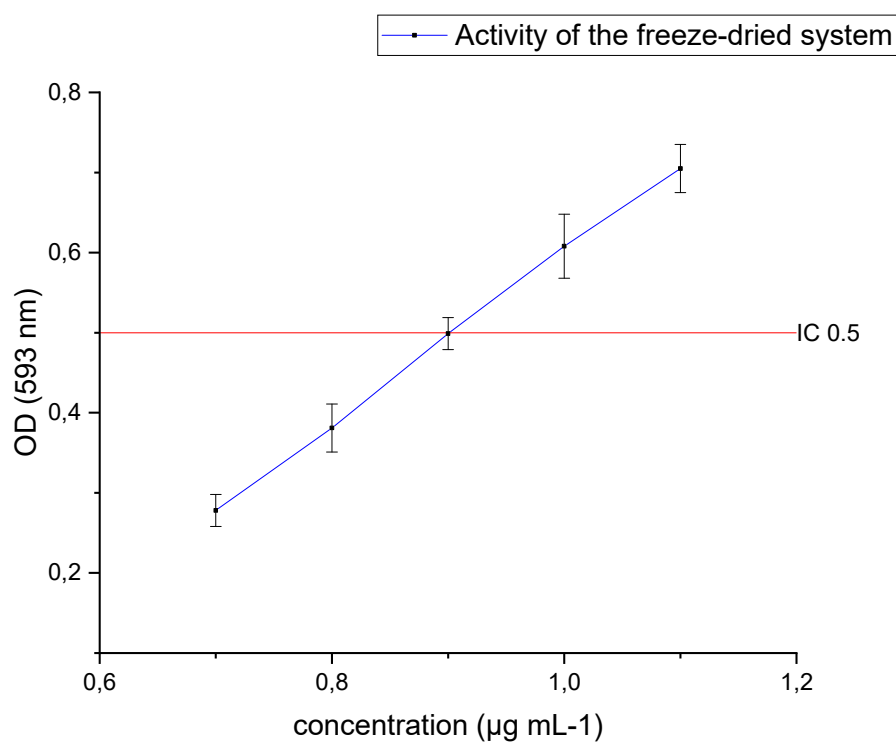

**Figure S4.** Antioxidant activity of Corni fructus system by FRAP assay

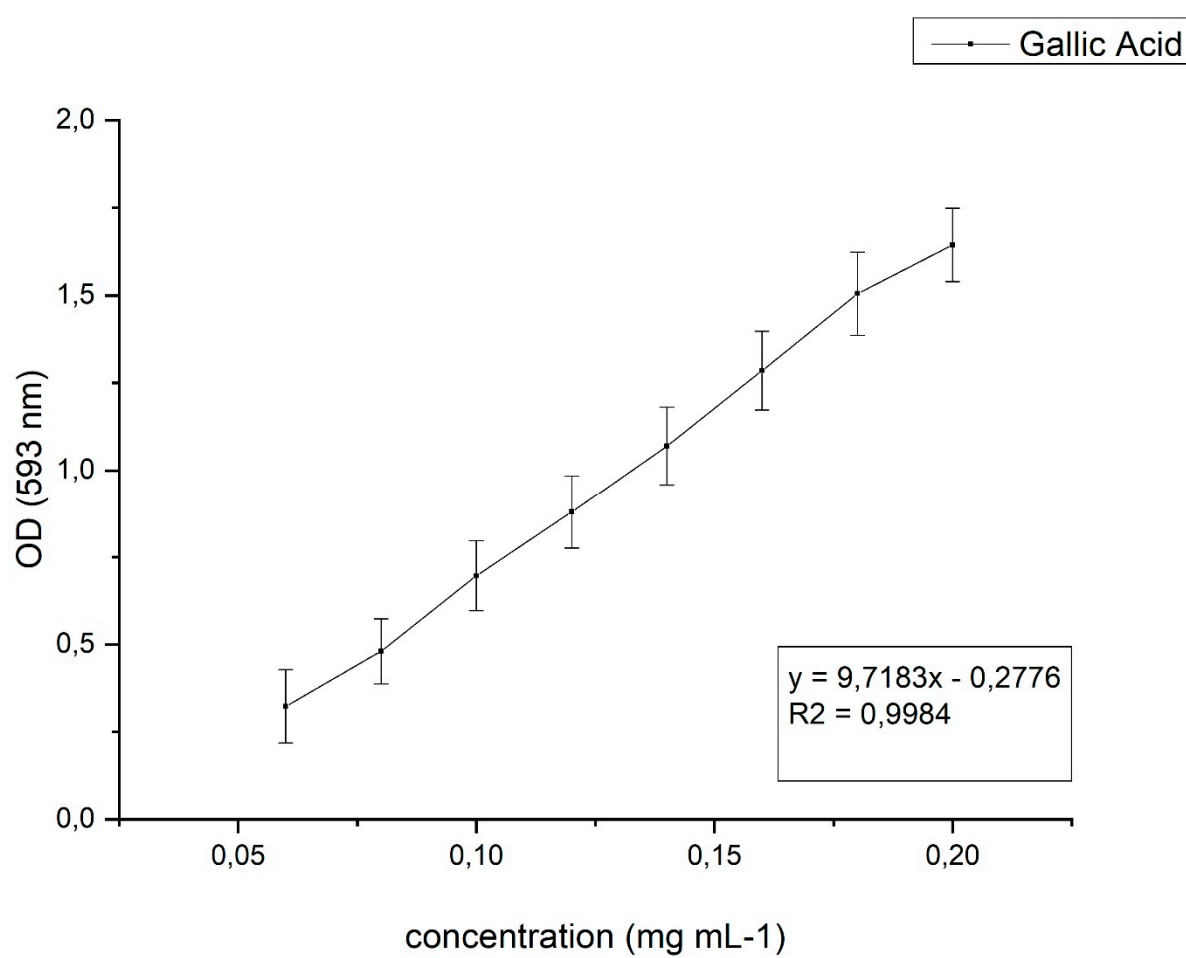

**Figure S5.** Curve for gallic acid used to calculate TPC content.
